# Supplementary material
Source: PubMed Central journal article supplement (PMC4071544)
Supplement: rspb20140528supp1.pdf [file rspb20140528supp1.pdf]

## 1 **Supporting information on data analysis**

### 2 **Sampling, DNA extraction, quality assessment**

3 Sampling was conducted during the 2010/2011 summer season in the king penguin colony of  
4 'La Baie du Marin' on Possession Island (46°25'S, 51°45'E) in the Crozet Archipelago. Blood (~  
5 100 µL) was collected from the brachial vein of chicks hatched in the long-term monitored  
6 area 'ANTAVIA', transferred to a filter paper (Whatman 113<sup>®</sup>), dried, and later frozen at -  
7 20°C. Individuals were randomly selected along a 120m-axis at the periphery of the colony,  
8 in order to maximise distance separation. A total of 140 individuals were chosen for  
9 mitochondrial DNA Control Region analysis, and 8 of these were randomly selected for  
10 restriction site-associated DNA (RAD) sequencing analysis. Total DNA were extracted from  
11 the filter papers using a Phenol-Chloroform protocol or the Qiagen DNAase blood & tissue  
12 kit according to manufacturer's instructions. After extraction, DNA quantity and quality were  
13 tested in each sample by fluorimetric-based measurement (Qubit, Invitrogen) and gel  
14 electrophoresis.

15

### 16 **MtDNA marker analysis**

17 Partial sequences of the Control Region (354 bp) were amplified and sequenced in 140  
18 samples according to the protocol published in Heupkin *et al.* [1]. PCR products were Sanger-  
19 sequenced in the ABI-LAB at the University of Oslo. Sequences were then manually edited  
20 and aligned in Bioedit [2]. All new haplotype sequences have been uploaded to GenBank  
21 (Accession number: KF530582-KF530720). Summary molecular statistics, demographic  
22 parameters and the mismatch distribution of pairwise differences were calculated in DNAsp  
23 v5 [3]. This dataset was used to infer the king penguin past demography employing the  
24 Bayesian Skyride plot [4], where inferred population history is bounded by credibility  
25 intervals that combine phylogenetic and coalescent uncertainties, as implemented in the  
26 BEAST 1.7.4 package [5]. Analyses were performed on the Bioportal facility (now LifePortal)  
27 running on the ABEL cluster, University of Oslo. A GTR+G+I substitution model was set for  
28 the mitochondrial sequence. A relaxed uncorrelated log-normal clock prior was set for the  
29 substitution rate to take into account fluctuations of the molecular clock along different

30 branches of the phylogeny; a log-normal priors with mean in the real space of 0.55  
31 substitution/site/Myr respectively were set [6]. The Bayesian Skyline plot was set as  
32 coalescent tree prior model. Convergence among three runs, with a MCMC length of 30  
33 million generations for each parameter setting was checked. Effective sample size was  
34 checked in Tracer 1.5 [7] and plots of population size change through time were drawn.

35

### 36 **RAD sequencing and genome-wide demographic inference**

37 Eight king penguin individuals were pooled and genotyped by RAD sequencing [8] in one  
38 library sequenced on an ILLUMINA HiSeq2000, yielding ca. 65 million 100-bp reads. All raw  
39 sequence reads are available on GenBank at the Sequence Read Archive (Run Num.:  
40 SRR942341).

41 After quality assessment, samples showing high molecular weight and highly  
42 concentrated DNA were employed in next-generation sequencing (NGS) of RADtags [8]. The  
43 following RADseq protocol was adopted: (i) approximately 100ng of genomic DNA per  
44 sample were digested with the restriction enzyme *SbfI* (NEB); (ii) each sample was then  
45 ligated to a unique barcoded P1 adapter prior to pooling in a single library. The library was  
46 then sheared by sonication, and gel electrophoresis of small library aliquots were run after  
47 the first 5 cycles (30" ON – 30" OFF) and then every 2-3 cycles of sonication; (iii) the target  
48 size range fraction (300-500 bp) was achieved after 8 cycles of sonication and was then  
49 selected by gel electrophoresis and manual excision; (iv) before size selection on the gel,  
50 sonicated libraries were concentrated to 25 µl by DNA capture on magnetic beads (beads  
51 solution:DNA = 0.8:1), thus further reducing the carry-over of non-ligated P1 adapters; (v)  
52 capture on magnetic beads using the same beads:DNA ratio (0.8:1) was then employed in all  
53 following purification steps (after blunt-end repairing, poly-A tailing, P2 adapter ligation and  
54 library enrichment by PCR); (vi) PCR amplification was performed in 8 x 12.5 µl aliquots  
55 pooled after the amplification in order to reduce amplification bias on few loci due to  
56 random drift; (vii) the library was then quantified by a fluorimetric-based method (Qubit,  
57 Invitrogen) and molarity was checked on an Agilent Bioanalyzer chip (Invitrogen). A final  
58 volume of 20 µl with a DNA concentration of 45 ng/µl was submitted for sequencing on an  
59 ILLUMINA HiSeq2000 sequencer at the Norwegian Sequencing Centre, University of Oslo.

60 Raw reads were then processed using the scripts included in the Stacks package [9]  
61 running on our server facility on the ABEL cluster, University of Oslo. Raw reads were quality  
62 filtered and grouped according to individual barcodes. Then individual loci were retrieved  
63 and SNPs were called by a maximum-likelihood function that excluded likely sequencing  
64 errors. Several runs with different settings of read trimming parameter, quality thresholds,  
65 mismatches allowed when building the individual and the population catalogs, were  
66 performed to check for consistency of the results. The parameters setting used to build the  
67 final catalog included: -t 95 and the default values for the quality checking when using  
68 "process\_radtags.pl"; -m 10, -n 7, -M 3 when running "denovo\_map.pl". 101,115 loci with  
69 50X average coverage were aligned in an unreferenced catalog. A table including all loci  
70 matching the eight sequenced individuals was built using "export\_sql.pl" Stacks script. This  
71 table was further filtered by python scripts (available upon request) excluding loci with  
72 missing data, with more than 2 alleles per individual, and deleveraged by Stacks algorithm.

73 Loci were then grouped according to the number of SNPs allowing from 0 to a  
74 maximum of 6 substitutions per locus (0 to 6-SNP classes). Loci with 4-6 SNPs were then  
75 directly checked through the catalog web-based interface provided by Stacks. Loci with more  
76 than 2 SNPs in the last 5 base pairs or with observed heterozygosity higher than 0.6 were  
77 blacklisted and removed from the table as likely sequencing errors or paralogous loci. Only  
78 those loci hosting 1 single bi-allelic SNP were employed in AFs analysis in order to minimize  
79 linkage among the data. Not having a reference genome, we could not exclude loci produced  
80 by adjacent genomic regions or by the two sides of each restriction site. Custom python  
81 scripts (available upon request) were employed to edit this 1-SNP dataset as a suitable input  
82 file for downstream statistical analysis encoding SNPs as 0-2 when homozygote for the two  
83 alleles respectively or 1 when heterozygote. On the other hand, loci in 2 to 6-SNP classes  
84 were treated as short sequences and locus-by-locus edited using python script as NEXUS  
85 format files each containing 16 sequences 95 bp long (two sequences per individual).

86 Minor allele frequency spectrum was calculated by functions available in the R  
87 package "adegenet" [10] using loci included in the 1-SNP class. This information was then  
88 passed to the python-based software *∂a∂i* [11] that, using a diffusion approximation to the  
89 allele frequency spectrum, allows demographic inference from genetic data testing  
90 alternative demographic scenarios in a maximum-likelihood framework. A sudden growth in

91 population size was tested against the null hypothesis of constant population size using the  
92 “two\_epoch” and the “snc” functions, respectively. Several runs of likelihood optimization  
93 were performed changing the extent of the search by the “fold” parameter in the  
94 “dadi.Misc.perturb\_params” function. Optimized log-likelihood and Theta values were  
95 recorded. In order to calculate effective population size from Theta values produced by  $\partial\text{adi}$ ,  
96 a total sequence length of 1,943,510 bp (95 bp X 20,458 loci used in this analysis) was used.

97 Functions included in the R package “ape” [12] and the R standard boxplot function  
98 [13] were used to calculate the joint mismatch distribution in the pairwise differences (from  
99 here onwards referred to as mismatch distribution density). Calculations were performed  
100 and plotted in each 2 to 6-SNP classes separately.

101 Different random combinations of 50-100 loci in 2 to 6-SNP classes were compared  
102 when inferring the past demography of the king penguin population using the coalescent-  
103 theory based multi-locus analysis implemented in BEAST 1.7.4. Linkage disequilibrium was  
104 tested in all subsets using Genepop [14] with the default setting in the web tool and the  
105 Bonferroni correction for multiple tests. The robustness of the approach was tested with  
106 respect to *i*) the number of SNPs per locus, *ii*) the different random selection of loci and *iii*)  
107 the number of loci included in the random selection: 50 loci in 2-SNP class (5 runs), 50 loci in  
108 3-SNP class (5 runs), 50 loci in 4-6-SNP class (10 runs), 10 loci in 4-6-SNP class (1 run), 25 loci  
109 in 4-6-SNP class (1 run) and 100 loci in 4-6-SNP class (1 run). Three runs showing hints of  
110 multiple optima for the demographic function were discarded. Different settings of the  
111 parameters and priors have been explored in preliminary analyses, but the following was the  
112 definitive setting: (i) markers were unlinked concerning site substitution model, clock model  
113 and tree prior model; (ii) site substitution model was set as a HKY with empirical base  
114 frequency; (iii) a strict molecular clock was estimated for each marker with a uniform prior  
115 distribution bounded within 0.5 and 0.005 sub/s/Myr; (iv) the Extended Bayesian Skyline Plot  
116 (EBSP; [15]) was selected as tree prior model and ploidy of the markers was set accordingly.  
117 Fine tuning of operators did not improve our results as running the analyses with longer  
118 MCMC simulations; 200 million iterations were set as run length.

119 Mitochondrial Control Region data were included in the analysis in order to test the  
120 consistency of the information provided by the two genetic dataset (genomic and

121 mitochondrial) and to calibrate the genomic substitution rate using the mtDNA Control  
122 Region substitution rate as estimated in the Adélie penguin. Site substitution and clock  
123 models were set as in the analyses of the mitochondrial marker alone (see below). All  
124 analyses were run on the Bioportal facility (now LifePortal) of the Abel cluster, University of  
125 Oslo. Results were checked on Tracer 1.5 and plot of the EBSP data were drawn in R [13]. An  
126 extensive study on Adélie penguin ancient DNA suggested a fast estimate (0.88 sub/s/Myr;  
127 [16]) for the substitution rate of the mitochondrial Control Region. Further analyses  
128 confirmed this high figure but it was downscaled to 0.55 sub/s/Myr [6]. We used the more  
129 conservative 0.55 sub/s/Myr for our calibrated demography. A generation time of 11.49  
130 years (Le Bohec *in prep*) was used to convert the population size estimates on the EBSP  
131 (given by default in effective population size \* generation time). We then plotted the  
132 population trend for the last 35,000 years together with the trend of temperature anomalies  
133 as inferred by the analysis of the EPICA Dome C ice core [17]. Concerning the calibration of  
134 the mean genome-wide substitution rate: first, the mean of the median values in each SNP-  
135 ratio class included in the EBSP analysis was calculated (4 to 6-SNP classes); then, a linear  
136 regression was used to infer the substitution rate of those SNP classes excluded from the  
137 EBSP analysis (0 to 3-SNP classes); finally, we calculated the mean genomic substitution rate  
138 weighting each SNP class accordingly with the frequency (number of loci) of each class.

139

## 140 **References**

- 141 1. Heupink T. H., van den Hoff J., Lambert D. M. 2012 King penguin population on Macquarie Island  
142 recovers ancient DNA diversity after heavy exploitation in historic times. *Biol. Lett.* **8**, 586–589.
- 143 2. Hall T. A. 1999 BioEdit: a user-friendly biological sequence alignment editor and analysis program for  
144 Windows 95/98/NT. *Nucl. Acids Symp. Ser.* **41**, 95-98.
- 145 3. Librado P., Rozas J. 2009 DnaSP v5: a software for comprehensive analysis of DNA polymorphism data.  
146 *Bioinformatics* **25**, 1451–1452.
- 147 4. Minin V. N., Bloomquist E. W. & Suchard M. A. 2008 Smooth Skyride through a Rough Skyline: Bayesian  
148 Coalescent-Based Inference of Population Dynamics. *Mol Biol Evol* **25**, 1459–1471.
- 149 5. Drummond A. J. & Rambaut A 2007 BEAST: Bayesian evolutionary analysis by sampling trees. *BMC Evol*

- 150 *Biol* **7**, 214.
- 151 6. Millar, C. D., Dodd, A., Anderson, J., Gibb, G. C., Ritchie, P. A., Baroni, C., Woodhams M. D., HENDY M. D.,  
152 Lambert D. M. 2008 Mutation and evolutionary rates in Adélie penguins from the Antarctic. *PLoS*  
153 *Genetics*, **4**, e1000209.
- 154 7. Rambaut A. & Drummond A. 2005 "Tracer version 1.3: a program for analyzing results from Bayesian  
155 MCMC programs such as BEAST and MrBayes." Distributed by the authors at: [http://evolove.zoo.ox.ac.](http://evolove.zoo.ox.ac.uk/software.html)  
156 [uk/software.html](http://evolove.zoo.ox.ac.uk/software.html)
- 157 8. Baird, N. A., Etter, P. D., Atwood, T. S., Currey, M. C., Shiver, A. L., Lewis, Z. A., Selker, E. U., Cresko, W. A.  
158 & Johnson, E. A. 2008 Rapid SNP Discovery and Genetic Mapping Using Sequenced RAD Markers. *PLoS*  
159 *ONE* **3**, e3376. (doi:10.1371/journal.pone.0003376)
- 160 9. Catchen J. M., Amores A., Hohenlohe P., Cresko W. & Postlethwait J. H. 2011 Stacks: Building and  
161 Genotyping Loci De Novo From Short-Read Sequences. *G3* **1**, 171–182.
- 162 10. Jombart T. & Ahmed I. 2011 adegenet 1.3-1: new tools for the analysis of genome-wide SNP data.  
163 *Bioinformatics* **27**, 3070–3071.
- 164 11. Gutenkunst R. N., Hernandez R. D., Williamson S. H. & Bustamante C. D. 2009 Inferring the Joint  
165 Demographic History of Multiple Populations from Multidimensional SNP Frequency Data. *PLoS Genet* **5**,  
166 e1000695.
- 167 12. Paradis E., Claude J. & Strimmer K. 2004 APE: Analyses of Phylogenetics and Evolution in R language.  
168 *Bioinformatics* **20**, 289–290.
- 169 13. R Development Core Team 2011 R Foundation for Statistical Computing, Vienna, Austria URL  
170 <http://www.R-project.org>.
- 171 14. Raymond M. & Rousset F. 1995 GENEPOP (version 1.2): population genetics software for exact tests and  
172 ecumenicism. *J. Heredity*, **86**, 248-249
- 173 15. Heled J. & Drummond A.J. 2008 Bayesian inference of population size history from multiple loci. *BMC*  
174 *Evol Biol* **8**, 289.
- 175 16. Lambert, D. M., Ritchie, P. A., Millar, C. D., Holland, B., Drummond, A. J., & Baroni, C. 2002 Rates of  
176 evolution in ancient DNA from Adélie penguins. *Science*, **295**, 2270-2273.
- 177 17. Jouzel, J., Masson-Delmotte, V., Cattani, O., Dreyfus, G., Falourd, S., Hoffmann, G., Minster B., Nouet J.,  
178 Barnola J. M., Chappellaz J. *et al* 2007 Orbital and millennial Antarctic climate variability over the past  
179 800,000 years. *Science*, **317**, 793-796.

180 **Figure S1.** Demographic reconstructions of the Crozet king penguin colony employing the  
181 Extended Bayesian Skyline Plot analysis. Consistency in the pattern inferred is compared  
182 among different data selections including 50 loci chosen at random from different classes of  
183 variation: a) 2 SNPs, 4 independent datasets; b) 3 SNPs, 4 independent datasets; c) 4-6 SNPs,  
184 9 independent datasets. In order to facilitate comparison of uncalibrated EBSP  
185 reconstruction and solely for visualization purpose, all runs were scaled to have the same  
186 value of the demographic function at  $t_0$ . To do so, we divided all demographic estimates by  
187 the ratio  $K_i = N_i(t_0)/\max(N_i(t_0))$ , where  $N_i(t_0)$  is the median value from the posterior  
188 distribution of the demographic function at  $t_0$  for each run. Correspondingly, the time  
189 intervals of each run were multiplied by the same ratio  $K_i$ , reflecting the assumption that the  
190 actual population size is the same across all runs. Median (black), 95% HPD lower (red) and  
191 upper (green) values are reported.

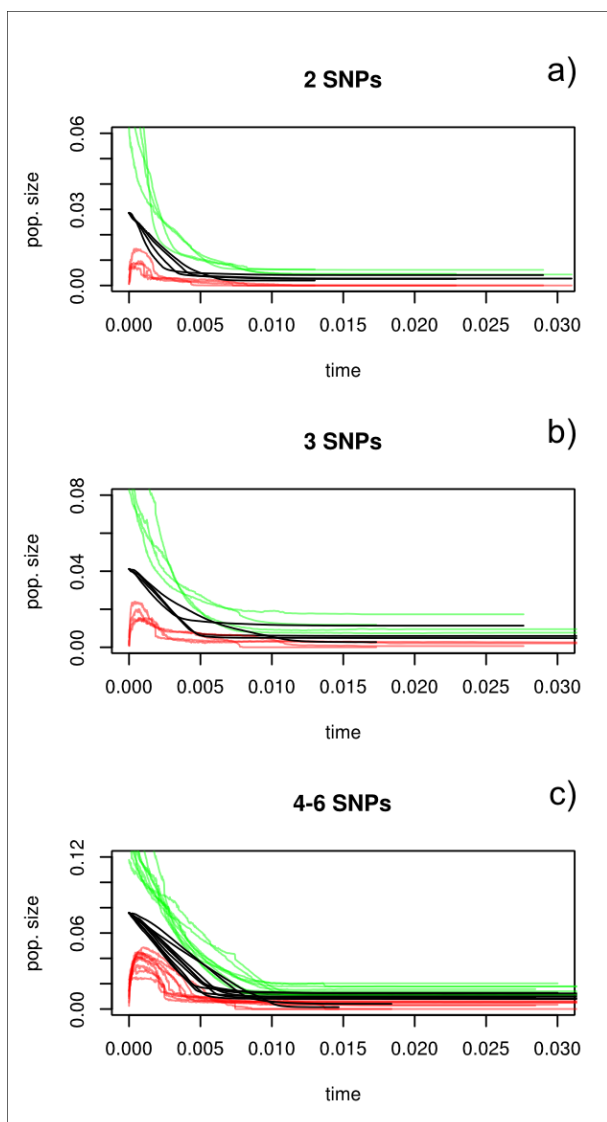

193 **Figure S2.** Demographic reconstructions of the Crozet king penguin colony employing the  
194 Extended Bayesian Skyline Plot analysis. Consistency of the inference is compared across  
195 three nested datasets (10, 25 and 50 loci) randomly selected from the 4-6-SNP class.  
196 Population size and time are unscaled. Median (solid line) and 95% upper and lower (filled  
197 areas) values are reported.

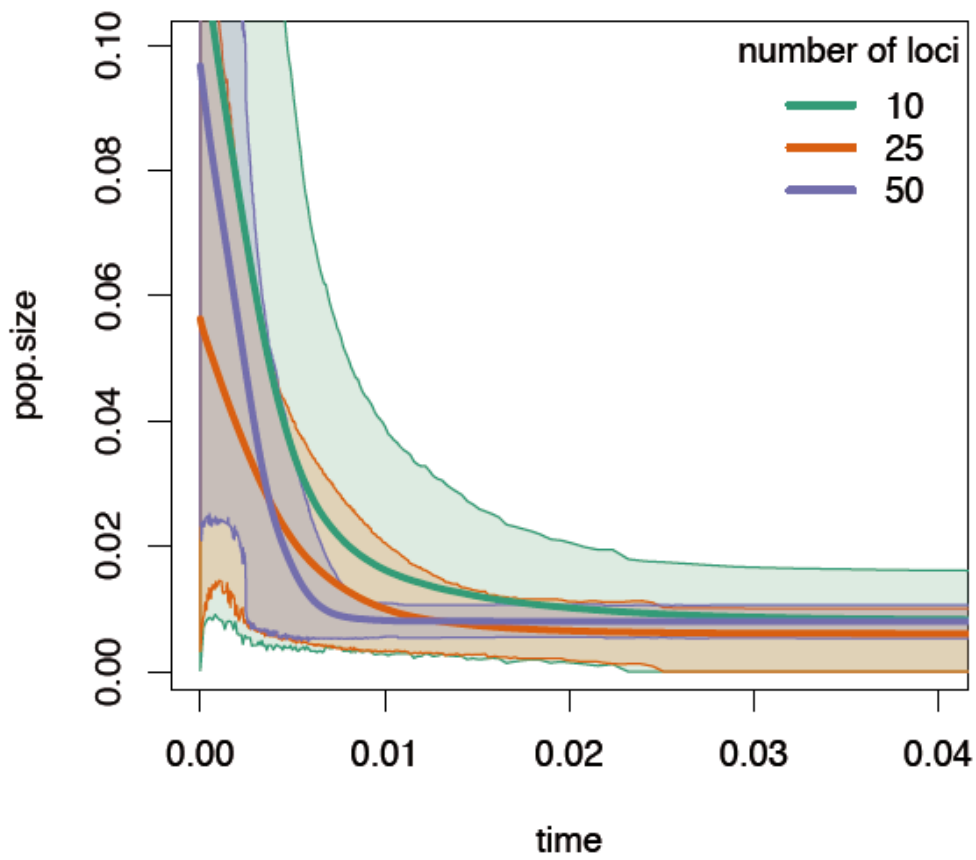

198  
199  
200  
201  
202  
203  
204



205 **Figure S3.** Bayesian Skyride Plot inferred from mitochondrial Control Region data describing  
206 population trend through time. Time is scaled according to median (solid black line), 95%  
207 upper and lower credibility region (filled blue area), as estimated in Millar *et al* [6].

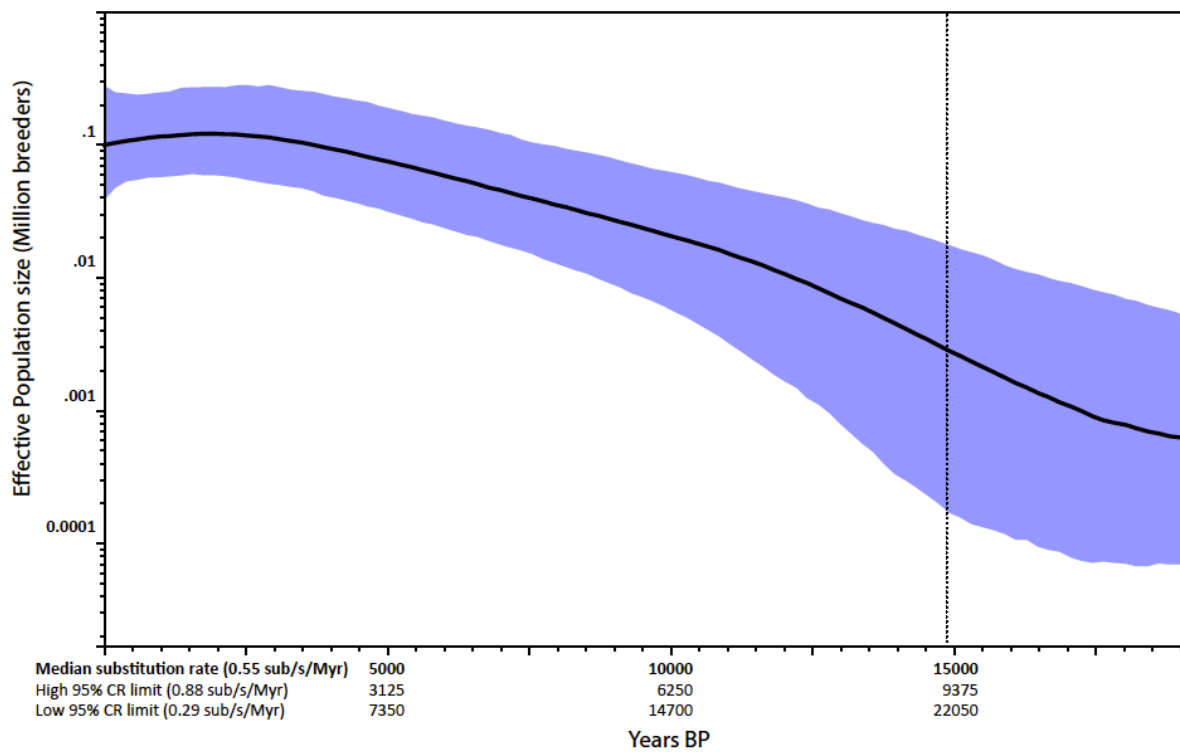

208

209
